# Supplementary material for: Autophagic digestion of Leishmania major by host macrophages is associated with differential expression of BNIP3, CTSE, and the miRNAs miR-101c, miR-129, and miR-210
Source: PubMed Central journal article supplement (PMC4521392; doi:10.1186/s13071-015-0974-3), 2015-07-31

## Rapamycin 1 h

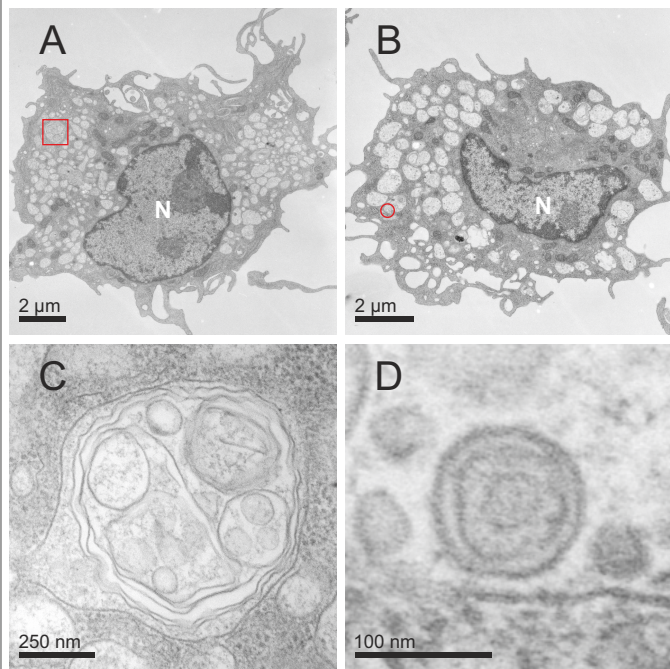

## HBSS 1 h

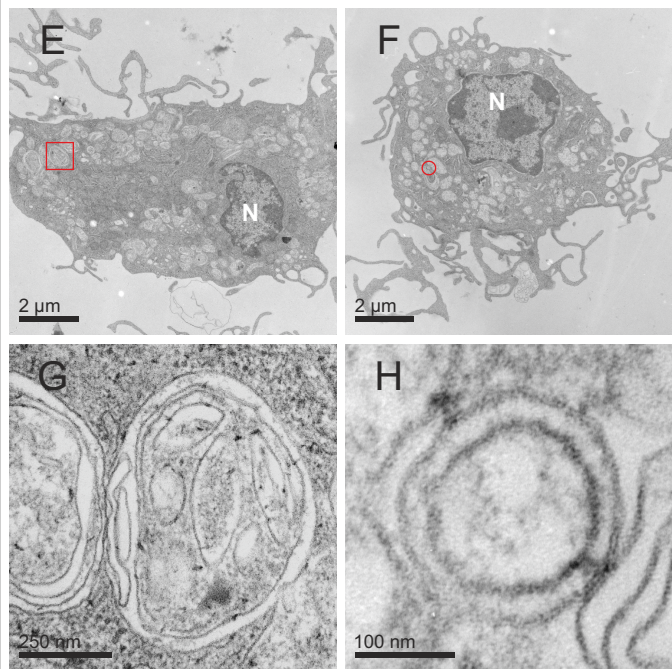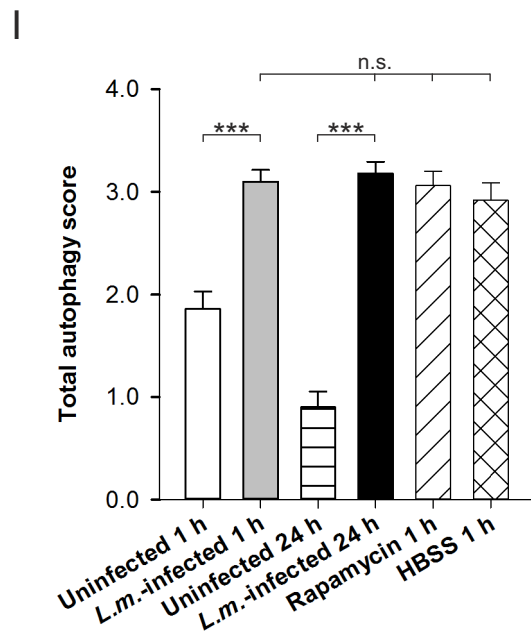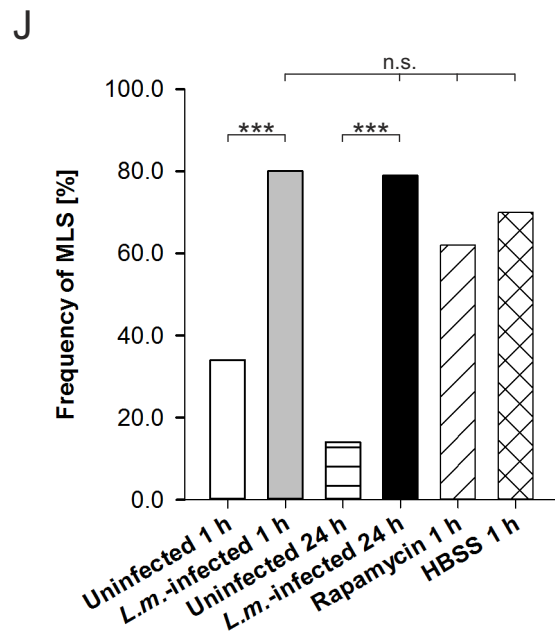

Supplement: 13071_2015_974_MOESM3_ESM.pdf [file 13071_2015_974_MOESM3_ESM.pdf]
