# Supplementary material for: Autophagic digestion of Leishmania major by host macrophages is associated with differential expression of BNIP3, CTSE, and the miRNAs miR-101c, miR-129, and miR-210
Source: PubMed Central journal article supplement (PMC4521392; doi:10.1186/s13071-015-0974-3), 2015-07-31

A

| Compound  | IC <sub>50</sub> -values [μM] |                       |
|-----------|-------------------------------|-----------------------|
|           | Amastigotes                   | BMDM                  |
| Baf A1    | > 0.0644 <sup>†</sup>         | > 0.0644 <sup>†</sup> |
| Rapamycin | > 2.0 <sup>†</sup>            | > 2.0 <sup>†</sup>    |

B

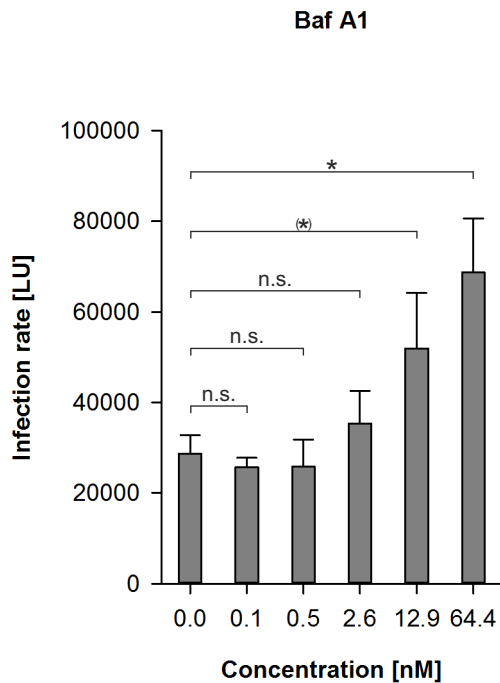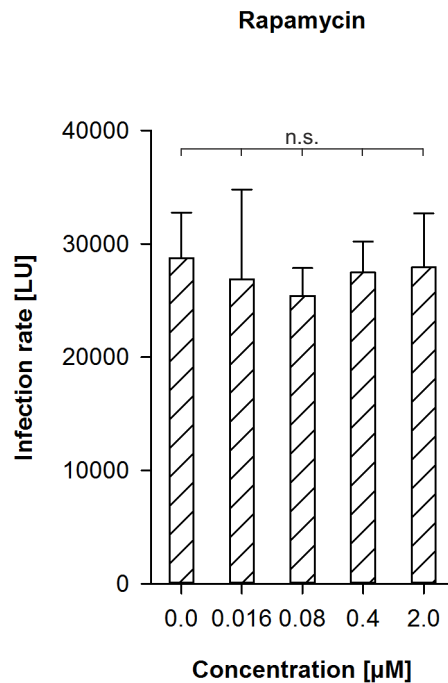

Supplement: 13071_2015_974_MOESM11_ESM.pdf [file 13071_2015_974_MOESM11_ESM.pdf]
