# Supplementary material for: Autophagic digestion of Leishmania major by host macrophages is associated with differential expression of BNIP3, CTSE, and the miRNAs miR-101c, miR-129, and miR-210
Source: PubMed Central journal article supplement (PMC4521392; doi:10.1186/s13071-015-0974-3), 2015-07-31
Supplement: 13071_2015_974_MOESM12_ESM.pdf [file 13071_2015_974_MOESM12_ESM.pdf]

A

| MONA<br>(miRNA) | LISA<br>(mRNA)         |                       |                        |                        |                     |                    |                     |                        |                        |                        |                      |                      |                      |                     | Σ interactions |
|-----------------|------------------------|-----------------------|------------------------|------------------------|---------------------|--------------------|---------------------|------------------------|------------------------|------------------------|----------------------|----------------------|----------------------|---------------------|----------------|
|                 | <u>mmu-miR-16-1-3p</u> | <u>mmu-miR-155-5p</u> | <u>mmu-miR-466e-3p</u> | <u>mmu-miR-466p-3p</u> | <u>mmu-miR-466g</u> | <u>mmu-miR-711</u> | <u>mmu-miR-1892</u> | <u>mmu-miR-1955-5p</u> | <u>mmu-miR-3068-3p</u> | <u>mmu-miR-3075-5p</u> | <u>mmu-miR-3473b</u> | <u>mmu-miR-5102*</u> | <u>mmu-miR-5115*</u> | <u>mmu-miR-5119</u> |                |
| <u>Abce1</u>    |                        |                       | x                      |                        | x                   |                    |                     |                        |                        |                        |                      |                      |                      |                     | 2              |
| <u>Acsf4</u>    | x                      |                       | x                      | x                      | x                   |                    |                     |                        |                        |                        |                      |                      |                      |                     | 4              |
| <u>Ahsa1</u>    |                        |                       |                        |                        |                     |                    |                     |                        |                        |                        | x                    |                      |                      |                     | 1              |
| <u>Aldoa</u>    |                        |                       |                        |                        |                     |                    |                     |                        |                        |                        | x                    |                      |                      |                     | 1              |
| <u>Ap2a2</u>    |                        |                       |                        | x                      | x                   |                    |                     |                        |                        |                        |                      | x                    |                      |                     | 3              |
| <u>Ddx6</u>     |                        |                       | x                      |                        |                     |                    | x                   |                        | x                      |                        | x                    | x                    | x                    | x                   | 7              |
| <u>Elf2ak2</u>  |                        |                       |                        |                        |                     |                    |                     |                        |                        |                        |                      |                      |                      |                     | 0              |
| <u>Eno2</u>     |                        |                       |                        |                        |                     | x                  |                     |                        |                        |                        |                      | x                    |                      |                     | 2              |
| <u>Fundc1</u>   |                        |                       |                        |                        |                     |                    |                     |                        |                        |                        |                      |                      |                      |                     | 0              |
| <u>Fus</u>      |                        |                       |                        |                        |                     | x                  |                     |                        |                        |                        |                      |                      |                      |                     | 1              |
| <u>Gapdh</u>    |                        |                       |                        |                        |                     |                    |                     |                        |                        | x                      |                      |                      |                      |                     | 1              |
| <u>Hells</u>    |                        |                       |                        |                        |                     |                    |                     |                        |                        |                        |                      |                      |                      |                     | 0              |
| <u>Hsp90aa1</u> |                        |                       |                        |                        |                     |                    |                     |                        |                        |                        |                      |                      |                      |                     | 0              |
| <u>Kctd12</u>   |                        |                       | x                      | x                      | x                   | x                  |                     | x                      |                        | x                      |                      | x                    |                      |                     | 7              |
| <u>Ldha</u>     |                        |                       |                        |                        | x                   |                    |                     |                        |                        |                        |                      |                      |                      |                     | 1              |
| <u>Map1c3b</u>  |                        |                       |                        |                        |                     | x                  |                     | x                      | x                      |                        | x                    | x                    |                      |                     | 5              |
| <u>Mcm3</u>     |                        |                       | x                      | x                      |                     |                    |                     |                        |                        |                        |                      |                      |                      |                     | 2              |
| <u>Mif</u>      |                        |                       |                        |                        |                     |                    |                     |                        |                        |                        | x                    |                      |                      |                     | 1              |
| <u>Nars</u>     |                        |                       |                        |                        |                     |                    |                     |                        |                        |                        |                      |                      |                      |                     | 0              |
| <u>Ndrq1</u>    |                        |                       |                        |                        |                     |                    |                     | x                      |                        |                        |                      |                      |                      |                     | 1              |
| <u>Nfat5</u>    |                        | x                     | x                      | x                      | x                   |                    |                     |                        | x                      | x                      |                      |                      |                      | x                   | 7              |
| <u>Pgk1</u>     |                        |                       |                        | x                      |                     |                    |                     |                        |                        |                        |                      |                      |                      |                     | 1              |
| <u>Pkm2</u>     |                        |                       |                        |                        |                     |                    |                     | x                      |                        |                        |                      |                      |                      |                     | 1              |
| <u>Prkag2</u>   |                        |                       | x                      |                        |                     |                    |                     |                        |                        |                        |                      |                      |                      |                     | 1              |
| <u>Sord</u>     |                        |                       |                        |                        |                     | x                  |                     |                        |                        | x                      |                      | x                    |                      | x                   | 4              |
| <u>Trim21</u>   |                        |                       |                        |                        |                     |                    |                     |                        |                        |                        |                      |                      |                      |                     | 0              |
| <u>Txnrd1</u>   |                        |                       |                        |                        |                     | x                  |                     |                        |                        |                        | x                    | x                    | x                    |                     | 4              |
| <u>Zcchc11</u>  |                        |                       |                        |                        |                     |                    |                     |                        |                        |                        | x                    |                      |                      |                     | 1              |
| Σ interactions  | 1                      | 1                     | 6                      | 7                      | 6                   | 6                  | 1                   | 4                      | 3                      | 4                      | 7                    | 7                    | 2                    | 3                   |                |

\* = removed entry

B

| miRNA                 | mRNA                |               |               |                |                   |                |                |                   | Σ interactions |
|-----------------------|---------------------|---------------|---------------|----------------|-------------------|----------------|----------------|-------------------|----------------|
|                       | <u>let-7f-1 /-2</u> | <u>let-7g</u> | <u>miR-16</u> | <u>miR-101</u> | <u>miR-129-5p</u> | <u>miR-155</u> | <u>miR-210</u> | <u>miR-542-5p</u> |                |
| <u>Atp4a /b /c /d</u> |                     |               |               | a, b, c        |                   |                |                |                   | 1              |
| <u>Bcl2</u>           |                     |               | c             |                |                   |                |                |                   | 1              |
| <u>Bnip3</u>          |                     |               |               |                |                   |                | f, e           |                   | 1              |
| <u>Egfr</u>           | a, b                | a, b          |               |                |                   |                | i              |                   | 3              |
| <u>Hif1a</u>          |                     |               |               |                |                   |                | f, h           |                   | 1              |
| <u>Nfkb1</u>          |                     |               |               |                |                   |                | i              |                   | 1              |
| <u>Rab5a</u>          |                     |               |               | a, b, c        |                   |                |                |                   | 1              |
| <u>Rheb</u>           |                     |               |               |                |                   | i              |                |                   | 1              |
| <u>Sp1</u>            |                     |               |               |                | k                 |                |                |                   | 1              |
| <u>Stmn1</u>          |                     |               |               | a, b, c        |                   |                |                |                   | 1              |
| <u>Zcchc11</u>        | i                   | i             |               |                |                   |                |                |                   | 2              |
| Σ interactions        | 2                   | 2             | 1             | 3              | 1                 | 1              | 3              | 1                 |                |
